# Supplementary material for: Soluble Starch Synthase Enzymes in Cereals: An Updated Review
Source: MDPI journal article supplement (doi:10.3390/agronomy11101983), 2021-09-30
Supplement: s1 [file s1]

**Table S1.** List of sequences used in this study.

| Gene          | Nucleotide accession number | Protein accession number | Species name             |
|---------------|-----------------------------|--------------------------|--------------------------|
| <i>SSI</i>    | FN179374.1                  | CAX51357.1               | <i>Hordeum vulgare</i>   |
| <i>SSII</i>   | AY133249.1                  | AAN28309.1               | <i>Hordeum vulgare</i>   |
| <i>SSIIIa</i> | FN179377.1                  | CAX51360.1               | <i>Hordeum vulgare</i>   |
| <i>SSIIIb</i> | FN179378.1                  | CAX51361.1               | <i>Hordeum vulgare</i>   |
| <i>SSIV</i>   | FN179379.1                  | CAX51362.1               | <i>Hordeum vulgare</i>   |
| <i>SSI</i>    | AY299404.1                  | AAP56350.1               | <i>Oryza sativa</i>      |
| <i>SSIIa</i>  | AB115917.1                  | BAD90593.1               | <i>Oryza sativa</i>      |
| <i>SSIIb</i>  | AF395537.1                  | AAK81729.1               | <i>Oryza sativa</i>      |
| <i>SSIIc</i>  | NM_001071213.1              | NP_001064678.1           | <i>Oryza sativa</i>      |
| <i>SSIIIa</i> | AF432915.1                  | AAL40942.1               | <i>Oryza sativa</i>      |
| <i>SSIIIb</i> | AY100469.1                  | AAM49811.1               | <i>Oryza sativa</i>      |
| <i>SSIVa</i>  | AY373257.1                  | AAQ82622.1               | <i>Oryza sativa</i>      |
| <i>SSIVb</i>  | AY373258.1                  | AAQ82623.1               | <i>Oryza sativa</i>      |
| <i>SSV</i>    | EU621837.1                  | ACC78131.1               | <i>Oryza sativa</i>      |
| <i>SSIIIa</i> | EU620720.1                  | ACC86846.1               | <i>Sorghum bicolor</i>   |
| <i>SSIIIb</i> | EU620721.1                  | ACC86847.1               | <i>Sorghum bicolor</i>   |
| <i>SSIV</i>   | XM_002440083.1              | XP_002440128.1           | <i>Sorghum bicolor</i>   |
| <i>SSV</i>    | KP192926                    | KP192926                 | <i>Sorghum bicolor</i>   |
| <i>SSI</i>    | AF091803.1                  | AAD54661.1               | <i>Triticum aestivum</i> |
| <i>SSII</i>   | AF155217.2                  | AAD53263.1               | <i>Triticum aestivum</i> |
| <i>SSIIIa</i> | AF258608.1                  | AAF87999.1               | <i>Triticum aestivum</i> |
| <i>SSIIIb</i> | EU333946.2                  | ABY56823.2               | <i>Triticum aestivum</i> |
| <i>SSIV</i>   | AY044844.1                  | AAK97773.1               | <i>Triticum aestivum</i> |
| <i>SSI</i>    | AF036891.2                  | AAB99957.2               | <i>Zea mays</i>          |
| <i>SSIIa</i>  | AF019296.1                  | AAD13341.1               | <i>Zea mays</i>          |
| <i>SSIIb</i>  | AF019297.1                  | AAD13342.1               | <i>Zea mays</i>          |
| <i>SSIIc</i>  | NM_001114648.1              | NP_001108120.1           | <i>Zea mays</i>          |
| <i>SSIIIa</i> | NM_001111411.1              | NP_001104881.1           | <i>Zea mays</i>          |
| <i>SSIIIb</i> | NM_001112545.1              | NP_001106015.1           | <i>Zea mays</i>          |
| <i>SSIV</i>   | EU599036.1                  | ACC63897.1               | <i>Zea mays</i>          |
| <i>SSV</i>    | NM_001130131.1              | NP_001123603.1           | <i>Zea mays</i>          |
